# Supplementary material for: Exuberant Endothelial C5b-9 Formation in Recurrent and De Novo Posttransplant Thrombotic Microangiopathy
Source: PubMed Central journal article supplement — Kidney Int Rep. 2024 Aug 22;9(11):3318–23. doi: 10.1016/j.ekir.2024.08.014 (PMC11551106; doi:10.1016/j.ekir.2024.08.014), 2024-08-22
Supplement: mmc1.pdf [file mmc1.pdf]

## **Exuberant endothelial C5b-9 formation in recurrent and de-novo post-transplant TMA**

Sistiana Aiello, Sara Gastoldi, Elena Bresin, Miriam Galbusera, Caterina Mele, Erica Daina, Donata Santarsiero, Giorgia Comai, Gaetano La Manna, Carolina Martinatto, Ariela Benigni, Giuseppe Remuzzi and Marina Noris.

### **Supplementary material :**

- Supplementary methods;
- Supplementary results;
- Supplementary references;
- Supplementary Table 1: Characteristics and clinical parameters of aHUS patients with recurrence after kidney transplant at the time of sample collection;
- Supplementary Table 2: Characteristics and clinical parameters of transplanted aHUS patients with no sign of recurrence at the time of sample collection;
- Supplementary Table 3: Characteristics and clinical parameters of patients with de-novo TMA at the time of sample collection;
- Supplementary Table 4: Characteristics and clinical parameters of aHUS patients in chronic dialysis at the time of sample collection;
- Supplementary Table 5: Characteristics, clinical and complement parameters of stable renal transplant patients at the time of sample collection;
- Supplementary Table 6: Characteristics, clinical and complement parameters of control dialyzed patients at the time of sample collection;
- Supplementary Table 7: Complement parameters and genetic characteristics of aHUS patients with recurrence after kidney transplant at the time of sample collection;
- Supplementary Table 8: Complement parameters and genetic characteristics of transplanted aHUS patients with no sign of recurrence at the time of sample collection;
- Supplementary Table 9: Complement parameters and genetic characteristics of patients with de-novo TMA at the time of sample collection;
- Supplementary Table 10: Complement parameters and genetic characteristics of aHUS patients in chronic dialysis at the time of sample collection;
- Appendix - International Registry of Recurrent and Familial HUS-TTP.

## ***Supplementary Methods***

### ***Study participants***

We evaluated three groups of patients: 1) 23 aHUS patients recipients of a kidney transplant of which 12 with recurrence and 11 with no sign of recurrence; 2) 22 transplant recipients who had other diseases in the native kidneys of which 15 developed de-novo post-transplant TMA and 7 with stable graft function; and 3) 39 patients on dialysis, including 28 patients with aHUS (4 of them were also studied after transplant) and 11 non-aHUS patients (Table 1 and Supplementary Tables S1-6) .

Patients and controls consented to participate in the “Mario Negri”, Biobank “Malattie Rare e Malattie Renali”. The patients’ main characteristics are shown in Table 1 (individual values are detailed in Suppl. Tables 1-6).

Participants were patients with aHUS or de-novo TMA post-kidney transplant, included in the International Registry of Recurrent and Familial Haemolytic Uremic Syndrome/Thrombotic Thrombocytopenic Purpura (HUS/TTP), who were analysed with the serum-induced C5b-9 formation assay in our laboratories between 2014 and 2023. The Registry was established in 1996 at the Aldo e Cele Daccò Clinical Research Center for Rare Diseases (Ranica, Bergamo) ([villacamozzi.marionegri.it/seu](http://villacamozzi.marionegri.it/seu)).

Inclusion criteria were diagnosis of aHUS, or de novo post-transplant TMA; analysis with the serum-induced C5b-9 formation assay on HMEC-1; kidney transplant or renal replacement therapy; no C5-inhibitors for at least 8 weeks prior to the time of serum collection; informed consent to participate in the “Malattie Rare e Malattie Renali” Biobank.

aHUS was diagnosed in patients who have had one or more episodes of microangiopathic hemolytic anemia and thrombocytopenia, with hematocrit (Ht) <30%, hemoglobin (Hb) <10 g/dL, serum lactate dehydrogenase (LDH) >500 IU/L, undetectable haptoglobin, fragmented erythrocytes in the peripheral blood smear, and platelet count <150,000/ $\mu$ L, associated with acute renal failure (serum creatinine >1.3 mg/dL for adults, >0.5 mg/dL for children below 5 years of age and >0.8 mg/dL for

children aged 5-10, and/or urinary protein/creatinine ratio >200 mg/g; or an increase in serum creatinine or a urinary protein/creatinine ratio >15% compared to baseline levels).<sup>6</sup> Recurrence in the graft in patients with a history of aHUS in the native kidneys was defined as exhibiting hematological and/or histologic markers of TMA: glomerular and/or arteriolar microthrombi, glomerular fibrinoid necrosis, amorphous material and endothelial swelling in glomerular capillaries and arterioles, glomerular fibrin, thickening and double contours of the glomerular basement membrane, and fragmented erythrocytes in microvessels and/or the interstitium.<sup>1</sup>

De-novo post-transplant TMA was defined based on the following criteria: hematological and/or histologic markers of TMA in kidney transplant patients who never had any evidence of TMA before transplantation. Diagnoses were made by the physicians who referred the patients for the C5b-9 assay and were revised by an independent clinician at the Clinical Research Center for Rare Diseases (E.B.). Only patients with a confirmed diagnosis were included in the study.

Patients had not taken C5 inhibitory drugs for at least 8 weeks prior to blood draws.

TTP was ruled out on the basis of ADAMTS13 activity >10% and no anti-ADAMTS13 antibodies. Stx-*E.Coli* infection was ruled out based on negative assays for *stx* and *eae* genes (by PCR) or Shiga-toxin (Vero cell assay) in the stool and/or anti-Shiga-toxin antibodies (ELISA) and/or LPS O157, O26, O111, or O145 (ELISA) in serum.

Full remission was defined as the normalisation of both hematological parameters (Ht >30%; Hb >10 g/dL; LDH <500 IU/L; platelets >150,000/ $\mu$ L) and renal function (serum creatinine <1.3 mg/dL for adults, <0.5 mg/dL for children below 5 years of age and <0.8 mg/dL for children aged 5-10; urinary protein/creatinine ratio <200 mg/g). Hematological remission in patients was defined as the normalisation of hematological parameters but with residual renal dysfunction.

The protocol was approved by the Ethical Committee of the Azienda Sanitaria Locale Bergamo, Italy.

### ***Genetic and biochemical complement abnormalities and anti-CFH autoantibodies***

The screening of coding sequences of aHUS-associated genes (*CFH*, *CFHR1*, *MCP*, *CFI*, *CFB*, *C3*, *THBD* and *DGKE*) and candidate genes (*CFHR2*, *CFHR3*, *CFHR4*, *CFHR5*, and *C5*) was performed using amplicon-based next-generation sequencing (S1). Rare functional variants (missense, nonsense, indel, or splicing variants) with minor allele frequency (MAF) <0.001 in the Genome Aggregation Database (gnomAD, <https://gnomad.broadinstitute.org/>) were selected. Stop-gain, frameshift and splicing variants, and missense variants with published functional studies, were categorised as pathogenic variants (PV). The other variants were categorised as likely pathogenic variants (LPV), variants of uncertain significance (VUS), likely benign or benign, using guidelines from the American College of Medical Genetics and Genomics (ACMG) and from the KDIGO conference on aHUS and C3G (S2-S4). We also used the Combined Annotation Dependent depletion tool (CADD), version 1.6, which is a tool for scoring the deleteriousness of single nucleotide variants as well as insertion/deletion variants, and which integrates multiple annotations into one metric (<https://cadd.gs.washington.edu/info>) (S5). We selected the PHRED-scaled C-score ranking. We searched for genomic abnormalities that affect the *CFH* and *CFHR* genes (S6) using multiplex ligation-dependent probe amplification, as reported (S1). We also genotyped the *CFH* single-nucleotide polymorphisms (SNPs) (c.1-331C>T, rs3753394; c.184G>A, p.V62I, rs800292; c.1204C>T, p.H402Y, rs1061170; c.2016A>G, p.Q672Q, rs3753396; c.2237-543G>A, rs1410996; c.2808G>T, p.E936D, rs1065489) that define the disease risk haplotype *CFH*<sub>TGTGGT</sub> (known as *CFH*-H3 haplotype) and one SNP in *MCP* (rs7144, c.\*897T>C) that tags the risk *MCP*<sub>GGAAC</sub> haplotype (S7-S8). Anti-FH autoantibodies were measured in plasma using ELISA (S9).

Complement C3 was measured using nephelometry. Normal ranges (defined as mean±2SD) for C3: 83-180 mg/dL, n=50. SC5b-9 levels were evaluated in EDTA plasma using MicroVue sC5b-9 Plus EIA (SC5b-9 Plus; Quidel). The normal range of plasma sC5b-9 in our laboratory is 127-400 ng/mL; n=50.

### ***Serum-induced C5b-9 deposition on HMEC-1***

The assay was performed as described previously,<sup>2</sup> with minor modifications. The human microvascular endothelial cells (HMEC-1 cell line) were a gift from Dr Edwin Ades and Francisco J. Candal of the CDC and Dr Thomas Lawley of Emory University, Atlanta, GA. The growth medium we used is MCDB 131 (Gibco, Grand Island, NY) supplemented with 10% foetal bovine serum (Gibco), 10 µg/mL hydrocortisone, 100 U/mL penicillin, 100 µg/mL streptomycin, 2 mM glutamine (Gibco), and 50 µg/mL endothelial cell growth factor. HMEC-1 (about 75,000 cells) were plated on glass coverslips and used when confluent. Cells were washed 3 times with test medium (HBSS: 137 mM NaCl, 5.4 mM KCl, 0.7 mM Na<sub>2</sub>HPO<sub>4</sub>, 0.73 mM KH<sub>2</sub>PO<sub>4</sub>, 1.9 mM CaCl<sub>2</sub>, 0.8 mM MgSO<sub>4</sub>, 28 mM Trizma base pH 7.3, 0.1% dextrose; with 0.5% BSA) and activated with 10 µM ADP (Sigma) for 10 minutes. Thereafter, cells were exposed for 2 hours to serum from patients or healthy subjects, 50% in test medium (HBSS with 0.5% BSA). HMEC-1 were then fixed in 3% paraformaldehyde and stained with rabbit anti-human complement C5b-9 complex antibody (Calbiochem) followed by FITC-conjugated secondary antibody (Jackson Immuno Research Laboratories).

Sera from 10 controls were pooled and the pool was run in each experiment as a reference (100%) for C5b-9 staining. We also analysed single sera from additional controls and calculated the percentages of C5b-9 deposits vs. control serum pool for each to set the normal range (mean±2SD of the percentage of C5b-9 deposits of the single control sera vs. control serum pool: ADP-activated HMEC-1, n=35 control sera, 60-149%; unstimulated HMEC-1, n=22 control sera, 50-150%). We verified the integrity of the cell monolayer after exposure to serum samples in parallel slides in which cells were stained with May-Grunwald Giemsa.

The fluorescent staining on the endothelial cell surface was acquired using the Apotome Axio Imager Z2 (Zeiss) microscope. Fifteen fields, which were systematically digitised along the surface,

were acquired using a computer-based image analysis system. The area occupied by the fluorescent staining was evaluated with automatic edge detection using the built-in specific functions of the software Image J (NIH, Bethesda, MD), and calculated as pixel<sup>2</sup> per field analysed.<sup>2</sup> For each sample, 15 fields were analysed; the highest and the lowest values were discarded and the mean of the other 13 fields was calculated. We expressed the results as the percentage of the staining compared to the control serum pool, run in parallel.<sup>2</sup>

### ***Statistical analysis***

Normality of distributions was visually inspected by box-plot representation and formally assessed with the D'Agostino-Pearson test. Between-groups differences were analysed using the t test, Mann-Whitney U test, or Fisher exact test, as appropriate. All data were analysed using MedCalc 10.0.1 statistical software. P values of less than 0.05 were considered statistically significant. Positive predictive values of serum induced C5b-9 assay were calculated as “true positive values / true positive + false positive values”; negative predictive values were calculated as “true negative values / true negative + false negative values”.

### **Supplementary results**

Calculations and results of positive and negative predictive values for either recurrent aHUS or de-novo TMA are as follows:

| aHUS Recurrence vs aHUS No Recurrence                |               |                |  |
|------------------------------------------------------|---------------|----------------|--|
|                                                      |               |                |  |
|                                                      | <b>aHUS-r</b> | <b>aHUS-nr</b> |  |
| <b>Positive results</b>                              | 11            | 1              |  |
| <b>Negative results</b>                              | 1             | 10             |  |
| Positive predictive value: 11 / (11+1): <b>0.916</b> |               |                |  |
| Negative predictive value: 10 / (10+1): <b>0.909</b> |               |                |  |

| De-Novo TMA vs Stable TX                             |                |               |  |
|------------------------------------------------------|----------------|---------------|--|
|                                                      |                |               |  |
|                                                      | <b>De Novo</b> | <b>Stable</b> |  |
| <b>Positive results</b>                              | 15             | 1             |  |
| <b>Negative results</b>                              | 0              | 6             |  |
| Positive predictive value: 15 / (15+1): <b>0.937</b> |                |               |  |
| Negative predictive value: 6 / (6+0): <b>1</b>       |                |               |  |

### Supplementary references

S1) Piras R, Valoti E, Alberti M, et al. CFH and CFHR structural variants in atypical Hemolytic Uremic Syndrome: Prevalence, genomic characterisation and impact on outcome. Front Immunol. 2023;13:1011580. doi: 10.3389/fimmu.2022.1011580.

S2) Goodship THJ, Cook HT, Fakhouri F, Fervenza FC, Frémeaux-Bacchi V, Kavanagh D, et al. Atypical hemolytic uremic syndrome and C3 glomerulopathy: Conclusions from a “Kidney disease:

Improving global outcomes” (KDIGO) controversies conference. *Kidney Int* 2017; 91:539–51. doi: 10.1016/j.kint.2016.10.005

S3) Richards S, Aziz N, Bale S, Bick D, Das S, Gastier-Foster J, et al. Standards and guidelines for the interpretation of sequence variants: A joint consensus recommendation of the American College of Medical Genetics and Genomics and the association for molecular pathology. *Genet Med Off J Am Coll Med Genet* 2015; 17:405–24. doi: 10.1038/gim.2015.30

S4) Kircher M, Witten DM, Jain P, O’Roak BJ, Cooper GM, Shendure J. A general framework for estimating the relative pathogenicity of human genetic variants. *Nat Genet* 2014;46:310–5. doi: 10.1038/ng.2892.

S5) Rentzsch P, Witten D, Cooper GM, Shendure J, Kircher M. CADD: predicting the deleteriousness of variants throughout the human genome. *Nucleic Acids Res* 2019; 47:D886–94. doi: 10.1093/nar/gky1016.

S6) Valoti E, Alberti M, Tortajada A, Garcia-Fernandez J, Gastoldi S, Besso L, et al. A novel atypical hemolytic uremic syndrome-associated hybrid CFHR1/CFH gene encoding a fusion protein that antagonises factor h-dependent complement regulation. *J Am Soc Nephrol* 2015; 26:209–19. doi: 10.1681/ASN.2013121339.

S7) Caprioli J, Castelletti F, Bucchioni S, Bettinaglio P, Bresin E, Pianetti G, et al. Complement factor h mutations and gene polymorphisms in haemolytic uraemic syndrome: The c-257T, the A2089G and the G2881T polymorphisms are strongly associated with the disease. *Hum Mol Genet* (2003) 12:3385–95. doi: 10.1093/hmg/ddg363.

S8) Esparza-Gordillo J, Goicoechea de Jorge E, Buil A, Carreras Berges L, López-Trascasa M, Sánchez-Corral P, et al. Predisposition to atypical hemolytic uremic syndrome involves the concurrence of different susceptibility alleles in the regulators of complement activation gene cluster in 1q32. *Hum Mol Genet* 2005; 14:703–12. doi: 10.1093/hmg/ddi066



S9). Valoti E, Alberti M, Iatropoulos P, Piras R, Mele C, Breno M, et al. Rare functional variants in complement genes and anti-FH autoantibodies-associated aHUS. *Front Immunol* 2019; 10:853. doi: 10.3389/fimmu.2019.00853

S10) Noris M, Remuzzi G. Cardiovascular complications in atypical haemolytic uraemic syndrome. *Nat Rev Nephrol* 2014;10:174-80.

**Supplementary Table 1.** Characteristics and clinical parameters of aHUS patients with recurrence after kidney trasplant at the time of sample collection.

| patient (n°) | gender | age (years) | native kidney disease | phase            | time from trasplant (days) | kidney donor | immunosuppression therapy | hystology | eculizumab* (response) | platelets                   | LDH          | hemoglobin | haptoglobin  | schistocytes | C3           | C4          | serum creatinin   |
|--------------|--------|-------------|-----------------------|------------------|----------------------------|--------------|---------------------------|-----------|------------------------|-----------------------------|--------------|------------|--------------|--------------|--------------|-------------|-------------------|
|              |        |             |                       |                  |                            |              |                           |           |                        | 150-400x10 <sup>3</sup> /μL | 266-500 IU/L | 14-18 g/dL | 30-200 mg/dL |              | 70-152 mg/dL | 15-40 mg/dL | 0.55 - 1.25 mg/dL |
| patient 1    | M      | 45          | aHUS                  | acute            | 3                          | cadaver      | TA - MMF - ST             | TMA       | YES (CR)               | 108                         | 1240         | 9.6        | 67           | n.a.         | 102          | 32          | 3.5               |
| patient 2    | M      | 26          | aHUS                  | acute            | 1                          | cadaver      | TA - MMF - ST             | TMA       | YES (CR)               | 52                          | 1060         | 13.5       | <30          | YES          | 72           | 22          | 9.56              |
| patient 3    | M      | 48          | aHUS                  | acute            | 9189                       | cadaver      | TA - MMF - ST             | n.a.      | NO                     | 102                         | 165          | 10.1       | 40           | n.a.         | 46           | 15          | 2.5               |
| patient 4    | M      | 72          | aHUS                  | acute            | 4227                       | n.a.         | TA - MMF - ST             | n.a.      | NO                     | 234                         | 622          | 9          | <7           | YES          | 62           | n.a.        | 4.4               |
| patient 5    | M      | 48          | aHUS                  | acute            | 9                          | cadaver      | ST                        | n.a.      | NO                     | 160                         | 435          | 8.5        | 53           | n.a.         | n.a.         | n.a.        | 4.97              |
| patient 6    | F      | 48          | aHUS                  | acute - post pex | 5                          | cadaver      | TA - MMF - ST             | n.a.      | NO                     | 37                          | 1977         | 10.4       | <10          | n.a.         | 79           | 18          | 6                 |
| patient 7    | F      | 29          | aHUS                  | acute            | 69                         | n.a.         | sirolimus - ST            | n.a.      | NO                     | 107                         | 309          | 9.4        | 40           | n.a.         | n.a.         | n.a.        | 2.91              |
| patient 8    | F      | 35          | aHUS                  | acute            | 2560                       | cadaver      | TA - MMF - ST             | TMA       | NO                     | 170                         | 532          | 9          | 95           | n.a.         | 77           | 15          | 1.5               |
| patient 9    | M      | 56          | aHUS                  | acute            | 121                        | cadaver      | TA - ST                   | n.a.      | n.a.                   | 90                          | 567          | 8.7        | n.a.         | n.a.         | n.a.         | n.a.        | 2.2               |
| patient 10   | M      | 61          | aHUS                  | acute            | 2920                       | cadaver      | TA - ST                   | n.a.      | NO                     | 161                         | 567          | 10.7       | 15           | n.a.         | 65           | 12          | 1.9               |
| patient 11   | F      | 45          | aHUS                  | acute            | 2561                       | cadaver      | TA - MMF - ST             | TMA       | YES (HR)               | 275                         | 372          | 9.4        | 67           | YES          | n.a.         | n.a.        | 6.3               |
| patient 12   | M      | 48          | aHUS                  | acute            | 135                        | cadaver      | TA - MMF                  | TMA       | NO                     | 100                         | 607          | 9.3        | <1           | YES          | 109          | 23          | 3.3               |

n.a. not available. TA, Tacrolimus. MMF, mycophenolate. ST, steroids. Pex, plasma exchange. CR, complete remission. HR, hematological remission.

\* treatment started after blood sample collection.

**Supplementary Table 2.** Characteristics and clinical parameters of transplanted aHUS patients with no sign of recurrence at the time of sample collection.

| patient (n°) | gender | age (years) | native kidney disease | phase     | time from trasplant (days) | kidney donor | immunosuppression therapy | hystology         | platelets<br>150-400x10 <sup>3</sup> /μL | LDH<br>266-500 IU/L | hemoglobin<br>14-18 g/dL | schistocytes | C3<br>83-180 mg/dL | C4<br>15-40 mg/dL | serum creatinin<br>0.55-1.25 mg/dL |
|--------------|--------|-------------|-----------------------|-----------|----------------------------|--------------|---------------------------|-------------------|------------------------------------------|---------------------|--------------------------|--------------|--------------------|-------------------|------------------------------------|
| patient 13   | F      | 29          | aHUS                  | remission | 1090                       | cadaver      | TA - MMF                  | n.a.              | 172                                      | n.a.                | 11.6                     | n.a.         | n.a.               | n.a.              | 0.76                               |
| patient 14   | F      | 39          | aHUS                  | remission | 2289                       | cadaver      | TA - MMF - ST             | n.a.              | 169                                      | 201                 | 13                       | n.a.         | 105                | 27                | 2.07                               |
| patient 15   | F      | 18          | aHUS                  | remission | 1585                       | n.a.         | n.a.                      | n.a.              | n.a.                                     | 115                 | n.a.                     | n.a.         | 84                 | 25                | n.a.                               |
| patient 16   | F      | 33          | aHUS                  | remission | 1717                       | cadaver      | TA - MMF - ST             | n.a.              | 440                                      | n.a.                | 12                       | n.a.         | n.a.               | n.a.              | 1                                  |
| patient 17   | F      | 60          | aHUS                  | remission | 2057                       | cadaver      | TA - MMF - ST             | n.a.              | 215                                      | n.a.                | 12.2                     | n.a.         | 112                | 54                | 2.23                               |
| patient 18   | F      | 56          | aHUS                  | remission | 7                          | cadaver      | TA - MMF - ST             | n.a.              | 155                                      | n.a.                | 13                       | n.a.         | n.a.               | n.a.              | 1.41                               |
| patient 19   | F      | 44          | aHUS                  | remission | 506                        | cadaver      | TA -MMF - ST              | n.a.              | 355                                      | n.a.                | 12.4                     | n.a.         | n.a.               | n.a.              | 1.53                               |
| patient 20   | M      | 75          | aHUS                  | remission | 4383                       | cadaver      | TA - MMF - ST             | n.a.              | 150                                      | n.a.                | 15                       | n.a.         | 125                | 41                | 1.5                                |
| patient 21   | M      | 45          | aHUS                  | remission | 1167                       | cadaver      | TA -MMF                   | MPGN              | 275                                      | 372                 | 12.4                     | NO           | 21                 | n.a.              | 2                                  |
| patient 22   | M      | 13          | aHUS                  | remission | 2728                       | cadaver      | TA - MMF - ST             | chronic rejection | 222                                      | 327                 | 6.9                      | n.a.         | 106                | 54                | 3.85                               |
| patient 23   | F      | 43          | aHUS                  | remission | 1040                       | cadaver      | n.a.                      | n.a.              | 275                                      | 327                 | 15                       | n.a.         | 78.2               | 35.4              | 0.8                                |

n.a. not available. TA, Tacrolimus. MMF, mycophenolate. ST, steroids. MPGN, membrano-proliferative-glomerulonephritis.

**Supplementary Table 3.** Characteristics and clinical parameters of patients with de-novo TMA at the time of sample collection.

| patient (n°) | gender | age (years) | native kidney disease | phase | time from trasplant (days) | kidney donor | immunosuppression therapy | hystology | eculizumab* response | platelets 150-400x10 <sup>3</sup> /μL | LDH 266-500 IU/L | hemoglobin 14-18 g/dL | haptoglobin 30-200 mg/dL | schistocytes | C3 70-152 mg/dL | C4 15-40 mg/dL | serum creatinin 0.55 - 1.25 mg/dL |
|--------------|--------|-------------|-----------------------|-------|----------------------------|--------------|---------------------------|-----------|----------------------|---------------------------------------|------------------|-----------------------|--------------------------|--------------|-----------------|----------------|-----------------------------------|
| patient 59   | F      | 63          | pyelonephritis        | acute | 4                          | cadaver      | TA - MMF - ST             | TMA       | YES (HR)             | 150                                   | 620              | 11                    | 97                       | n.a.         | 104             | 26             | 5.6                               |
| patient 60   | M      | 65          | IgA N                 | acute | 96                         | cadaver      | TA - MMF - ST             | TMA       | NO                   | 93                                    | 628              | 9.3                   | <20                      | n.a.         | 84              | 21             | 1.76                              |
| patient 61   | F      | 64          | Good-pasture          | acute | 1                          | cadaver      | TA - MMF - ST             | TMA       | YES (CR)             | 133                                   | 1162             | 13.6                  | 45                       | YES          | n.a.            | n.a.           | 7                                 |
| patient 62   | M      | 59          | ADPKD                 | acute | 12                         | cadaver      | TA - MMF - ST             | TMA       | YES (HR)             | 178                                   | 751              | 7.7                   | <30                      | YES          | n.a.            | n.a.           | 7.4                               |
| patient 63   | F      | 66          | hypertension          | acute | 4                          | cadaver      | TA - MMF - ST             | n.a.      | YES (HR)             | 36                                    | 1746             | 7.9                   | <30                      | n.a.         | n.a.            | n.a.           | 9                                 |
| patient 64   | M      | 59          | diabetic N            | acute | 8                          | cadaver      | TA - MMF - ST             | n.a.      | YES (CR)             | 79                                    | 317              | 8.7                   | <30                      | YES          | n.a.            | n.a.           | 4.28                              |
| patient 65   | M      | 58          | obstructive N         | acute | 8                          | cadaver      | MMF - ST                  | n.a.      | NO                   | 90                                    | 1249             | 9.3                   | <20                      | n.a.         | 104             | 27             | 3.48                              |
| patient 66   | M      | 81          | tubulo-interstitial N | acute | 6047                       | cadaver      | TA - MMF - ST             | n.a.      | YES (NR)             | 98                                    | 506              | 9.4                   | <5                       | YES          | 59              | 11             | 1.4                               |
| patient 67   | M      | 51          | IgA N                 | acute | 6595                       | cadaver      | TA - ST                   | n.a.      | n.a.                 | 110                                   | n.a.             | n.a.                  | n.a.                     | n.a.         | 72              | 26             | 4.55                              |
| patient 68   | M      | 60          | ANCA-vasculitis       | acute | 3                          | cadaver      | TA - MMF - ST             | TMA       | YES (CR)             | 70                                    | 1790             | 7.7                   | <30                      | n.a.         | n.a.            | n.a.           | 11                                |
| patient 69   | F      | 46          | lupus N               | acute | 5                          | cadaver      | TA - MMF - ST             | TMA       | YES (CR)             | 76                                    | 369              | 7.5                   | <30                      | YES          | 81              | 35             | 5.93                              |
| patient 70   | M      | 60          | ADPKD                 | acute | 3                          | cadaver      | TA - MMF - ST             | TMA       | YES (HR)             | 71                                    | 951              | 9                     | 49                       | YES          | n.a.            | n.a.           | 9.4                               |
| patient 71   | M      | 57          | PAH / CRI             | acute | 1497                       | n.a.         | n.a.                      | n.a.      | NO                   | 95                                    | 624              | 10                    | <1                       | n.a.         | 79.5            | 20.5           | 5.3                               |
| patient 72   | M      | 73          | IgA N                 | acute | 3                          | cadaver      | TA - MMF - ST             | n.a.      | YES (CR)             | 39                                    | 627              | 8.3                   | <30                      | YES          | n.a.            | n.a.           | 4.35                              |
| patient 73   | M      | 55          | diabetic N            | acute | 3                          | cadaver      | TA -MMF - ST              | TMA       | n.a.                 | 63                                    | n.a.             | 11.9                  | <30                      | n.a.         | n.a.            | n.a.           | 12.4                              |

n.a. not available. TA, Tacrolimus. MMF, mycophenolate. ST, steroids. N, nephropathy. ADPKD, autosomal dominant polycystic kidney disease. PAH/CRI, pulmonary arterial hypertension/chronic renal insufficiency.

\* treatment started after blood sample collection. CR, complete remission. HR, hematological remission. NR, no remission.

**Supplementary Table 4.** Characteristics and clinical parameters of aHUS patients in chronic dialysis at the time of sample collection.

| patient (n°) | gender | age (years) | native kidney disease | dialysis | platelets<br>150-400x10 <sup>3</sup> /μL | LDH<br>266-500 IU/L | hemoglobin<br>14-18 g/dL | haptoglobin<br>30-200 mg/dL | C3<br>70-152 mg/dL | C4<br>15-40 mg/dL | serum creatinin<br>0.55 - 1.25 mg/dL |
|--------------|--------|-------------|-----------------------|----------|------------------------------------------|---------------------|--------------------------|-----------------------------|--------------------|-------------------|--------------------------------------|
| patient 24   | F      | 74          | aHUS                  | HD       | 302                                      | 488                 | 14.6                     | n.a.                        | 105                | 35.4              | 3.81                                 |
| patient 25   | F      | 39          | aHUS                  | HD       | 163                                      | 653                 | 10.4                     | n.a.                        | n.a.               | n.a.              | 4.59                                 |
| patient 22   | M      | 14          | aHUS                  | HD       | 150                                      | 611                 | 8                        | n.a.                        | 67                 | 34                | 4.15                                 |
| patient 26   | F      | 35          | aHUS                  | HD       | 302                                      | 303                 | 11.5                     | n.a.                        | 47.7               | 27.5              | 8.9                                  |
| patient 27   | M      | 51          | aHUS                  | PD       | 188                                      | 489                 | 13.5                     | 232                         | 111                | 41                | 14.9                                 |
| patient 28   | F      | 43          | aHUS                  | HD       | 177                                      | 277                 | 8                        | 91                          | 79                 | 25                | 9.95                                 |
| patient 29   | F      | 27          | aHUS                  | HD       | 228                                      | 309                 | 12.7                     | n.a.                        | 45                 | 20                | 11                                   |
| patient 30   | F      | 54          | aHUS                  | HD       | 105                                      | 339                 | 9.75                     | n.a.                        | 72                 | 32                | 4.87                                 |
| patient 31   | M      | 41          | aHUS                  | HD       | 189                                      | 409                 | 8                        | n.a.                        | n.a.               | n.a.              | 12                                   |
| patient 15   | F      | 11          | aHUS                  | PD       | 254                                      | 339                 | 9.2                      | n.a.                        | n.a.               | n.a.              | 3.5                                  |
| patient 17   | F      | 52          | aHUS                  | PD       | 291                                      | 352                 | 11.1                     | n.a.                        | 112                | 54                | 11                                   |
| patient 32   | F      | 71          | aHUS                  | HD       | n.a.                                     | n.a.                | n.a.                     | n.a.                        | n.a.               | n.a.              | n.a.                                 |
| patient 33   | F      | 43          | aHUS                  | PD       | 164                                      | 394                 | 12.2                     | n.a.                        | 86                 | n.a.              | 3.2                                  |
| patient 34   | F      | 43          | aHUS                  | HD       | 260                                      | 345                 | 14.5                     | n.a.                        | 58                 | 27                | 8.4                                  |
| patient 35   | F      | 46          | aHUS                  | HD       | 168                                      | 447                 | 12.8                     | n.a.                        | n.a.               | n.a.              | 8.8                                  |
| patient 36   | M      | 57          | aHUS                  | HD       | 130                                      | 418                 | 13.2                     | n.a.                        | 51                 | n.a.              | 9                                    |
| patient 37   | F      | 37          | aHUS                  | HD       | 328                                      | 453                 | 11.4                     | n.a.                        | 63                 | 33                | 8.11                                 |
| patient 38   | F      | 49          | aHUS                  | HD       | 238                                      | n.a.                | 11.6                     | n.a.                        | n.a.               | n.a.              | 11.6                                 |
| patient 39   | F      | 48          | aHUS                  | HD       | n.a.                                     | n.a.                | n.a.                     | n.a.                        | n.a.               | n.a.              | n.a.                                 |
| patient 40   | M      | 51          | aHUS                  | HD       | n.a.                                     | n.a.                | n.a.                     | n.a.                        | n.a.               | n.a.              | n.a.                                 |
| patient 41   | M      | 52          | aHUS                  | HD       | 175                                      | 401                 | 13.6                     | n.a.                        | 111                | n.a.              | 6.6                                  |
| patient 42   | M      | 53          | aHUS                  | n.a.     | 176                                      | n.a.                | 13.6                     | n.a.                        | 67                 | 47                | 7.58                                 |
| patient 43   | F      | 37          | aHUS                  | HD       | 269                                      | n.a.                | 9.6                      | n.a.                        | 48.6               | 25                | 11                                   |
| patient 20   | M      | 60          | aHUS                  | PD       | n.a.                                     | n.a.                | n.a.                     | n.a.                        | 125                | 41                | 8                                    |
| patient 44   | F      | 23          | aHUS                  | HD       | 209                                      | n.a.                | 11.9                     | n.a.                        | 36.4               | 28.3              | 5.7                                  |
| patient 45   | M      | 2           | aHUS                  | PD       | 395                                      | n.a.                | 12.6                     | n.a.                        | n.a.               | n.a.              | 11.4                                 |
| patient 46   | F      | 46          | aHUS                  | HD       | 179                                      | 136                 | 10.6                     | 37                          | n.a.               | n.a.              | n.a.                                 |
| patient 47   | F      | 25          | aHUS                  | HD       | 166                                      | 397                 | 9.3                      | n.a.                        | 67                 | 19                | n.a.                                 |

n.a. not available. HD, hemodialysis. PD, peritoneal dialysis.

**Supplementary Table 5.** Characteristics, clinical and complement parameters of stable renal transplant patients at the time of sample collection.

| patient (n°) | gender | age (years) | native kidney disease | time from trasplant (days) | Kidney donor | immunosuppression therapy | platelets 150-400x10 <sup>3</sup> /μL | hemoglobin 14-18 g/dL | serum creatinin 0.55-1.25 mg/dL | C5b-9 on HMEC-1        |                         |
|--------------|--------|-------------|-----------------------|----------------------------|--------------|---------------------------|---------------------------------------|-----------------------|---------------------------------|------------------------|-------------------------|
|              |        |             |                       |                            |              |                           |                                       |                       |                                 | unstimulated (50-150%) | ADP-activated (60-149)% |
| patient 74   | M      | 81          | FSGS                  | 182                        | cadaver      | TA - MMF                  | 200                                   | 13.4                  | 2.29                            | 106                    | 109                     |
| patient 75   | F      | 59          | proteinuric N         | 730                        | cadaver      | TA - MMF                  | 343                                   | 14.9                  | 1.21                            | 100                    | 113                     |
| patient 76   | M      | 49          | IgA N                 | 730                        | cadaver      | TA - MMF                  | 191                                   | 12.9                  | 1.16                            | 95                     | 97                      |
| patient 77   | M      | 61          | ADPKD                 | 1460                       | cadaver      | TA - MMF                  | 227                                   | 13.4                  | 1.33                            | 101                    | 108                     |
| patient 78   | M      | 56          | hypertensive N        | 2190                       | cadaver      | TA - MMF                  | 206                                   | 14.5                  | 1.58                            | 113                    | 122                     |
| patient 79   | M      | 36          | IgA N                 | 6                          | living       | TA - MMF - ST             | 196                                   | 10.7                  | 1.03                            | 217                    | 221                     |
| patient 80   | M      | 39          | IgA N                 | 182                        | cadaver      | TA - MMF                  | 139                                   | 13.4                  | 1.39                            | 98                     | 99                      |

TA, Tacrolimus. MMF, mycophenolate. ST, steroids. FSGS, focal segmental glomerulosclerosis. N, nephropathy. ADPKD, autosomal dominant polycystic kidney disease.

**Supplementary Table 6.** Characteristics, clinical and complement parameters of control dialyzed patients at the time of sample collection.

| patient (n°) | gender | age (years) | native kidney disease | dialysis | platelets<br>150-400x10 <sup>3</sup> /μL | LDH<br>266-500 IU/L | hemoglobin<br>14-18 g/dL | C3<br>70-152 mg/dL | C4<br>15-40 mg/dL | plasma<br>sC5b-9<br>140-280 ng/mL | serum<br>creatinin<br>0.55 - 1.25 mg/dL | C5b-9 on HMEC-1           |                            | rare gene<br>variants |
|--------------|--------|-------------|-----------------------|----------|------------------------------------------|---------------------|--------------------------|--------------------|-------------------|-----------------------------------|-----------------------------------------|---------------------------|----------------------------|-----------------------|
|              |        |             |                       |          |                                          |                     |                          |                    |                   |                                   |                                         | unstimulated<br>(50-150%) | ADP-activated<br>(60-149)% |                       |
| patient 48   | M      | 48          | ADPKD                 | HD       | 179                                      | 320                 | 13                       | 111                | 23                | n.a.                              | 15.22                                   | 110                       | 148                        | n.a.                  |
| patient 49   | M      | 26          | proteinuric N         | PD       | 264                                      | 436                 | 12.4                     | 149                | 28                | n.a.                              | 9.4                                     | 115                       | 116                        | n.a.                  |
| patient 50   | M      | 47          | ADPKD                 | HD       | 166                                      | n.a.                | 12.3                     | n.a.               | n.a.              | n.a.                              | 13.7                                    | 95                        | 99                         | n.a.                  |
| patient 51   | M      | 32          | CRI                   | HD       | 267                                      | 353                 | 11.9                     | n.a.               | n.a.              | n.a.                              | 14.74                                   | 91                        | 121                        | n.a.                  |
| patient 52   | F      | 27          | ADPKD                 | PD       | 359                                      | 269                 | 9                        | 113                | 25                | n.a.                              | 12.91                                   | 65                        | 78                         | n.a.                  |
| patient 53   | M      | 46          | fabry disease         | PD       | 256                                      | 257                 | 11.8                     | 93                 | 19                | n.a.                              | 10.3                                    | 98                        | 130                        | n.a.                  |
| patient 54   | M      | 46          | MPGN                  | PD       | 250                                      | 353                 | 11.7                     | 96                 | 22                | n.a.                              | 10.36                                   | 91                        | 102                        | n.a.                  |
| patient 55   | M      | 28          | nephroangio sclerosis | HD       | 277                                      | 277                 | 12                       | 64                 | 43                | n.a.                              | 17.47                                   | 105                       | 119                        | NO                    |
| patient 56   | M      | 39          | CRI                   | PD       | 268                                      | 440                 | 13.4                     | 119                | 35                | 175                               | 7.24                                    | 113                       | 138                        | NO                    |
| patient 57   | M      | 62          | ADPKD                 | HD       | 240                                      | n.a.                | 11.4                     | 78                 | 27                | n.a.                              | 7.73                                    | 94                        | 159                        | NO                    |
| patient 58   | F      | 59          | horse kidney          | HD       | 251                                      | n.a.                | 11.2                     | n.a.               | n.a.              | n.a.                              | 8                                       | 115                       | 127                        | NO                    |

n.a. not available. N, nephropathy. ADPKD, autosomal dominant polycystic kidney disease. MPGN, membrano-proliferative-glomerulonephritis. CRI, chronic renal insufficiency. HD, hemodialysis. PD, peritoneal dialysis.

**Supplementary Table 7.** Complement parameters and genetic characteristics of aHUS patients with recurrence after kidney transplant at the time of sample collection.

| patient (n°) | plasma sC5b-9<br>140-280 ng/mL | C5b-9 on HMEC-1           |                            |      | rare gene variants |                       |                     |                                            |            | risk haplotypes |               |                 |              |
|--------------|--------------------------------|---------------------------|----------------------------|------|--------------------|-----------------------|---------------------|--------------------------------------------|------------|-----------------|---------------|-----------------|--------------|
|              |                                | unstimulated<br>(50-150%) | ADP-activated<br>(60-149)% |      | gene               | nucleotide<br>change  | aminoacid<br>change | gnomAD<br>frequency                        | CADD       | classification  | CFH-H3<br>(n) | MCPggaac<br>(n) | total<br>(n) |
| patient 1    | n.a.                           | 161                       | 151                        | YES  | CFI                | c.905-3T>C            | -                   | 1.4x10 <sup>-4</sup>                       | 13         | VUS             | 2             | 0               | 2            |
| patient 2    | n.a.                           | 298                       | 365                        | NO   | -                  | -                     | -                   | -                                          | -          | -               | 1             | 0               | 1            |
| patient 3    | 102                            | 173                       | 182                        | n.a. | -                  | -                     | -                   | -                                          | -          | -               | n.a.          | n.a.            | n.a.         |
| patient 4    | n.a.                           | 196                       | 197                        | YES  | MCP                | c.286+2T>G            | -                   | 1x10 <sup>-4</sup>                         | 14.5       | PV              | 1             | 2               | 3            |
| patient 5    | n.a.                           | 255                       | 283                        | NO   | -                  | -                     | -                   | -                                          | -          | -               | 0             | 2               | 2            |
| patient 6*   | n.a.                           | 84                        | 86                         | NO   | -                  | -                     | -                   | -                                          | -          | -               | 0             | 0               | 0            |
| patient 7    | n.a.                           | 204                       | 219                        | NO   | -                  | -                     | -                   | -                                          | -          | -               | 0             | n.a.            | 0            |
| patient 8    | 96                             | 209                       | 212                        | NO   | -                  | -                     | -                   | -                                          | -          | -               | 2             | 1               | 3            |
| patient 9    | 1043                           | 165                       | 180                        | NO   | -                  | -                     | -                   | -                                          | -          | -               | 1             | 2               | 3            |
| patient 10   | n.a.                           | 187                       | 187                        | NO   | -                  | -                     | -                   | -                                          | -          | -               | 2             | 1               | 3            |
| patient 11   | 269                            | 182                       | 204                        | YES  | MCP<br>CFI         | c.286+2T>G<br>c.G950A | -<br>p.R317Q        | 1x10 <sup>-4</sup><br>5.8x10 <sup>-5</sup> | 14.5<br>15 | PV<br>VUS       | 2             | 2               | 4            |
| patient 12   | 242                            | 169                       | 178                        | YES  | MCP                | c.C1148T              | p.T383I             | 1.9x10 <sup>-3</sup>                       | 4          | VUS             | 2             | 1               | 3            |

n.a. not available. VUS, variant of uncertain significance. PV, pathogenic variant.



**Supplementary Table 8.** Complement parameters and genetic characteristics of transplanted aHUS patients with no sign of recurrence at the time of sample collection.

| patient (n°) | plasma sC5b-9<br>140-280 ng/mL | C5b-9 on HMEC-1           |                            |     | gene                          | rare gene variants                                                                |                     |                      |      |                | risk haplotypes |                 |              |
|--------------|--------------------------------|---------------------------|----------------------------|-----|-------------------------------|-----------------------------------------------------------------------------------|---------------------|----------------------|------|----------------|-----------------|-----------------|--------------|
|              |                                | unstimulated<br>(50-150%) | ADP-activated<br>(60-149)% |     |                               | nucleotide<br>change                                                              | aminoacid<br>change | gnomAD<br>frequency  | CADD | classification | CFH-H3<br>(n)   | MCPggaac<br>(n) | total<br>(n) |
| patient 13   | n.a.                           | 105                       | 173                        | YES | CFI                           | c.A779G                                                                           | p.Q260R             | 2.4x10 <sup>-5</sup> | 1    | VUS            | 0               | 0               | 0            |
| patient 14   | n.a.                           | 145                       | 180                        | NO  | -                             | -                                                                                 | -                   | -                    | -    | -              | 0               | 0               | 0            |
| patient 15   | 219                            | 123                       | 159                        | NO  | -                             | -                                                                                 | -                   | -                    | -    | -              | 0               | 1               | 1            |
| patient 16   | n.a.                           | 107                       | 138                        | NO  | -                             | -                                                                                 | -                   | -                    | -    | -              | 0               | 2               | 2            |
| patient 17   | 295                            | 78                        | 256                        | NO  | -                             | -                                                                                 | -                   | -                    | -    | -              | 1               | 1               | 2            |
| patient 18   | n.a.                           | 135                       | 172                        | NO  | -                             | -                                                                                 | -                   | -                    | -    | -              | n.a.            | n.a.            | n.a.         |
| patient 19   | n.a.                           | 95                        | 198                        | NO  | -                             | -                                                                                 | -                   | -                    | -    | -              | 2               | 1               | 3            |
| patient 20   | 676                            | 132                       | 264                        | YES | CFI                           | c.C148G                                                                           | p.P50A              | 1x10 <sup>-3</sup>   | 24.9 | VUS            | 0               | 1               | 1            |
| patient 21   | 2092                           | 131                       | 161                        | YES | CFI                           | c.G1075T                                                                          | p.D359Y             | 8.7x10 <sup>-6</sup> | 24.4 | VUS            | 0               | 0               | 0            |
| patient 22   | n.a.                           | 133                       | 135                        | YES | C3<br><i>CFHR1/CFH hybrid</i> | c.G2284A<br>reverse hybrid <i>CFHR1</i> <sub>1-5</sub> - <i>CFH</i> <sub>23</sub> | p.V762I             | 0.0002               | 0.25 | VUS<br>PV      | 0               | 2               | 2            |
| patient 23   | n.a.                           | 215                       | 225                        | NO  | -                             | -                                                                                 | -                   | -                    | -    | -              | 1               | 0               | 1            |

n.a. not available. VUS, variant of uncertain significance. PV, pathogenic variant.

**Supplementary Table 9.** Complement parameters and genetic characteristics of patients with de-novo TMA at the time of sample collection.

| patient (n°) | plasma sC5b-9<br>140-280 ng/mL | C5b9 on HMEC-1            |                            |     | rare gene variants |                      |                     |                     |      | risk haplotypes |               |                 |              |
|--------------|--------------------------------|---------------------------|----------------------------|-----|--------------------|----------------------|---------------------|---------------------|------|-----------------|---------------|-----------------|--------------|
|              |                                | unstimulated<br>(50-150%) | ADP-activated<br>(60-149)% |     | gene               | nucleotide<br>change | aminoacid<br>change | gnomAD<br>frequency | CADD | classification  | CFH-H3<br>(n) | MCPggaac<br>(n) | total<br>(n) |
| patient 59   | n.a                            | 171                       | 247                        | NO  | -                  | -                    | -                   | -                   | -    | -               | 0             | 1               | 1            |
| patient 60   | n.a                            | 196                       | 230                        | NO  | -                  | -                    | -                   | -                   | -    | -               | 0             | 0               | 0            |
| patient 61   | 235                            | 181                       | 213                        | NO  | -                  | -                    | -                   | -                   | -    | -               | 1             | 0               | 1            |
| patient 62   | 252                            | 245                       | 262                        | NO  | -                  | -                    | -                   | -                   | -    | -               | 1             | 0               | 1            |
| patient 63   | n.a                            | 175                       | 201                        | NO  | -                  | -                    | -                   | -                   | -    | -               | 0             | 0               | 0            |
| patient 64   | 974                            | 197                       | 242                        | NO  | -                  | -                    | -                   | -                   | -    | -               | 0             | 1               | 1            |
| patient 65   | n.a                            | 378                       | 384                        | NO  | -                  | -                    | -                   | -                   | -    | -               | 0             | 0               | 0            |
| patient 66   | n.a                            | 188                       | 235                        | YES | CFH                | c.C1511T             | p. T504M            | 3x10 <sup>-4</sup>  | 6.3  | VUS             | 0             | 1               | 1            |
| patient 67   | n.a                            | 303                       | 311                        | NO  | -                  | -                    | -                   | -                   | -    | -               | 0             | 0               | 0            |
| patient 68   | 831                            | 193                       | 209                        | NO  | -                  | -                    | -                   | -                   | -    | -               | 0             | 0               | 0            |
| patient 69   | n.a                            | 230                       | 268                        | YES | CFH                | c.C3626T             | p. S1209L           | -                   | 9    | VUS             | 1             | 0               | 1            |
| patient 70   | 833                            | 301                       | 352                        | YES | C3                 | c.G1909C             | p. G637R            | 5x10 <sup>-4</sup>  | 23.5 | LPV             | 1             | 1               | 2            |
| patient 71   | n.a                            | 241                       | 244                        | NO  | -                  | -                    | -                   | -                   | -    | -               | 0             | 2               | 2            |
| patient 72   | 277                            | 232                       | 273                        | NO  | -                  | -                    | -                   | -                   | -    | -               | 1             | 0               | 1            |
| patient 73   | 358                            | 194                       | 225                        | NO  | -                  | -                    | -                   | -                   | -    | -               | 1             | 0               | 1            |

n.a. not available.

**Supplementary Table 10.** Complement parameters and genetic characteristics of aHUS patients in chronic dialysis at the time of sample collection.

| patient (n°) | plasma sC5b-9 140-280 ng/mL | C5b 9 on HMEC-1        |                         |      | gene                          | rare gene variants                                                                |                  |                      |           | classification | risk haplotypes |              |           |
|--------------|-----------------------------|------------------------|-------------------------|------|-------------------------------|-----------------------------------------------------------------------------------|------------------|----------------------|-----------|----------------|-----------------|--------------|-----------|
|              |                             | unstimulated (50-150%) | ADP-activated (60-149)% |      |                               | nucleotide change                                                                 | aminoacid change | gnomAD frequency     | CADD      |                | CFH-H3 (n)      | MCPggaac (n) | total (n) |
| patient 24   | 233                         | 97                     | 246                     | YES  | CFH                           | c.C3628T                                                                          | p.R1210C         | 0.0003               | 11.8      | PV             | 1               | 1            | 2         |
| patient 25   | 380                         | 129                    | 193                     | YES  | CFH                           | c.A232G                                                                           | p.R78G           | -                    | 15.8      | PV             | 0               | 1            | 1         |
| patient 22   | 127                         | 114                    | 213                     | YES  | C3<br><i>CFHR1/CFH hybrid</i> | c.G2284A<br>reverse hybrid <i>CFHR1</i> <sub>1-5</sub> - <i>CFH</i> <sub>23</sub> | p.V762I<br>-     | 0.0002<br>-          | 0.25<br>- | VUS<br>PV      | 0               | 2            | 2         |
| patient 26   | n.a                         | 120                    | 154                     | YES  | C3                            | c.G181A                                                                           | p.D61N           | 1x10 <sup>-4</sup>   | 19        | LPV            | 2               | 1            | 3         |
| patient 27   | 260                         | 145                    | 201                     | NO   | -                             | -                                                                                 | -                | -                    | -         | -              | 0               | 0            | 0         |
| patient 28   | n.a                         | 111                    | 173                     | NO   | -                             | -                                                                                 | -                | -                    | -         | -              | 1               | 0            | 1         |
| patient 29   | 1436                        | 78                     | 229                     | YES  | C3                            | c.1774C>T                                                                         | p.R592W          | 1.5x10 <sup>-5</sup> | 34        | LPV            | 2               | 2            | 4         |
| patient 30   | n.a                         | 102                    | 199                     | n.a. | -                             | -                                                                                 | -                | -                    | -         | -              | n.a.            | n.a.         | n.a.      |
| patient 31   | n.a                         | 139                    | 235                     | NO   | -                             | -                                                                                 | -                | -                    | -         | -              | 0               | 1            | 1         |
| patient 15   | 183                         | 148                    | 504                     | NO   | -                             | -                                                                                 | -                | -                    | -         | -              | 0               | 1            | 1         |
| patient 17   | 295                         | n.a.                   | 409                     | NO   | -                             | -                                                                                 | -                | -                    | -         | -              | 1               | 1            | 2         |
| patient 32   | n.a                         | n.a.                   | 336                     | YES  | CFI                           | c.G1234A                                                                          | p.V412M          | 0.0013               | 25        | VUS            | 0               | 2            | 2         |
| patient 33   | 444                         | 128                    | 266                     | YES  | C3                            | c.A3187C                                                                          | p.S1063R         | 3.7x10 <sup>-5</sup> | 23.4      | LPV            | 0               | n.a.         | n.a.      |
| patient 34   | n.a                         | 104                    | 155                     | NO   | -                             | -                                                                                 | -                | -                    | -         | -              | 1               | 0            | 1         |
| patient 35   | n.a                         | 142                    | 164                     | NO   | -                             | -                                                                                 | -                | -                    | -         | -              | 0               | 0            | 0         |
| patient 36   | n.a                         | n.a.                   | 403                     | YES  | CFH                           | c.G3587T                                                                          | p.E1172X         | 0.0002               | -         | PV             | 0               | n.a.         | n.a.      |
| patient 37   | n.a                         | n.a.                   | 590                     | YES  | CFH                           | c.C3572T                                                                          | p.S1191L         | -                    | 18.6      | PV             | 0               | 2            | 2         |
| patient 38   | 91                          | 173                    | 177                     | YES  | <i>CFHR1/CFH hybrid</i>       | reverse hybrid <i>CFHR1</i> <sub>1-4</sub> - <i>CFH</i> <sub>22-23</sub>          | -                | -                    | -         | PV             | 1               | 0            | 1         |
| patient 39   | n.a                         | 155                    | 276                     | NO   | -                             | -                                                                                 | -                | -                    | -         | -              | 1               | 1            | 2         |
| patient 40   | n.a                         | 191                    | 197                     | YES  | C3                            | c.4973T>C                                                                         | p.V1658A         | -                    | 1.45      | VUS            | n.a.            | n.a.         | n.a.      |
| patient 41   | 236                         | n.a.                   | 605                     | YES  | <i>CFHR1/CFH hybrid</i>       | reverse hybrid <i>CFHR1</i> <sub>1-5</sub> - <i>CFH</i> <sub>23</sub>             | -                | -                    | -         | PV             | 1               | 2            | 3         |
| patient 42   | 467                         | 249                    | 286                     | NO   | -                             | -                                                                                 | -                | -                    | -         | -              | 1               | 1            | 2         |
| patient 43   | n.a                         | n.a.                   | 1219                    | YES  | CFH                           | c.3493+1G>C                                                                       | -                | -                    | 24.3      | PV             | 2               | 0            | 2         |
| patient 20   | 676                         | n.a.                   | 250                     | YES  | CFI                           | c.C148G                                                                           | p.P50A           | 1x10 <sup>-3</sup>   | 24.9      | VUS            | 0               | 1            | 1         |
| patient 44   | 294                         | 137                    | 170                     | YES  | C3                            | c.T544C                                                                           | p.S182P          | -                    | 7.12      | VUS            | 0               | 0            | 0         |
| patient 45   | n.a                         | 120                    | 157                     | NO   | -                             | -                                                                                 | -                | -                    | -         | -              | 0               | 0            | 0         |
| patient 46   | n.a                         | 140                    | 189                     | YES  | CFI                           | c.C148G                                                                           | p.P50A           | 1x10 <sup>-3</sup>   | 24.9      | VUS            | 1               | 1            | 2         |
| patient 47   | n.a                         | 193                    | 207                     | NO   | -                             | -                                                                                 | -                | -                    | -         | -              | 1               | 1            | 2         |

n.a. not available. PV, pathogenic variant. LPV, likely pathogenic variant. VUS, variant of uncertain significance.

---

*International Registry of Recurrent and Familial HUS/ TTP*

---

*Coordinator*

**G. Remuzzi**

Istituto di Ricerche Farmacologiche Mario Negri IRCCS, Clinical Research Center for Rare Diseases *Aldo e Cele Daccò*, Ranica, Bergamo, Italy

*Registry Management*

**E. Daina, E. Bresin, S. Gamba, M. Rigoldi, C. Martinatto, L. Bottanelli**

*Biochemical and Genetic Studies*

**M. Noris, S. Gastoldi, S. Aiello, C. Mele, M. Breno, M. Alberti, R. Donadelli, R. Piras, D. Santarsiero**

*Laboratory Analysis*

**D. Cugini, N. Stucchi**

*Statistical Analysis*

**A. Perna**

*Secretaries*

**M. Lena, M. Avenia**

Istituto di Ricerche Farmacologiche Mario Negri IRCCS, Clinical Research Center for Rare Diseases *Aldo e Cele Daccò*, Ranica, Bergamo, Italy

---

*The contributions of the Centers that have reported cases to the Registry over the years are recognized in the scientific papers that were published along the time. ([link pubblicazioni registro](#)).*

*The Centers that have reported cases since 2010 are listed below:*

---

*Investigators - Italy*

**M.I. Moretti, M. Valente** (AOU Ospedali Riuniti Umberto I, Ancona); **V. Albano, P. Pierani** (Pediatric Clinic, "G. Salesi" Hospital, Ancona); **V. Pellu** (Division of Nephrology and Dialysis, Ospedale Regionale, Aosta); **M. Giordano, D.D. Torres** (Division of Nephrology and Dialysis, "Giovanni XXIII" Pediatric Hospital, Bari); **G.L. Gesualdo, E.D. Stea** (Division of Nephrology, Ospedale Policlinico Consorziiale, Bari); **P. Ruggenenti, V. Portalupi, C. Carrara, P. Ondeì, A. Gennarini** (Division of Nephrology and Dialysis, Papa Giovanni XXIII Hospital, Bergamo); **L. Martelli, L. Verdoni** (Division of Pediatrics, Papa Giovanni XXIII Hospital, Bergamo); **A. Falanga, L. Barcella** (Division of Immunohematology, Papa Giovanni XXIII Hospital, Bergamo); **G. La Manna, O. Baraldi, G. Comai, V. Corradetti, A.L. Croci Chiochini, M. Santostefano** (Division of Nephrology and Dialysis, "S.Orsola-Malpighi" Hospital, Bologna); **A. Pasini** (Division of Pediatric Nephrology and Dialysis, "S.Orsola-Malpighi" Hospital, Bologna); **R.M. Lerchner, D. Stringa** (Division of Nephrology and Dialysis, Hospital of Bolzano); **M. Gaggiotti, G. Jeannin, C. Manenti, F. Verzelletti, R. Zani** (Division of Nephrology and Dialysis, "Spedali Civili, Azienda Ospedaliera", Brescia); **A. Pani, A. Atzeni** (Division of Nephrology, "G. Brotzu" Hospital, Cagliari); **A.M. Mamusa** (Division of Hematology, "G. Brotzu"

Hospital, Cagliari); **D. Bonucchi, S. Cimino** (Division of Nephrology and Dialysis, "Ramazzini" Hospital, Carpi, Modena); **C. Abaterusso, A. Mele, E. Pierobon, R. Lazzarin** (Division of Nephrology and Dialysis, "S. Giacomo" Hospital, Castelfranco Veneto, Treviso); **A. Granata** (Division of Nephrology and Dialysis, Cannizzaro Hospital, Catania); **A. Cagliotti, M. Capria** (Division of Nephrology and Dialysis, Mater Domini Hospital, Catanzaro); **V. Agostini** (Division of Immunohematology, "Maurizio Bufalini" Hospital, Cesena); **L. Baldrati, L. Neri** (Division of Nephrology and Dialysis, "Maurizio Bufalini" Hospital, Cesena); **M. Bonomini** (Division of Nephrology and Dialysis, SS. Annunziata Hospital, Chieti); **L. Besso, S. Bainotti, A. Maffè** (Division of Nephrology and Dialysis, "S. Croce e Carle" Hospital, Cuneo); **M.E. Giovenzana** (Division of Nephrology and Dialysis, Hospital of Desio, Monza Brianza); **A. Bandera, M. Giozzet** (Division of Nephrology and Dialysis, S. Maria del Prato Hospital, Feltre, Belluno); **S. Forcellini, M. Russo** (Division of Nephrology and Dialysis, Arcispedale Sant'Anna, Ferrara); **P. Romagnani, F. Becherucci** (Division of Nephrology, "A. Meyer" Hospital, Firenze); **L. Caroti, L. Cirami** (Division of Nephrology and Dialysis, "Careggi" Hospital, Firenze); **C. Grimaldi** (Division of Nephrology, "S. Giovanni di Dio" Hospital, Firenze); **S. Bernardi, F. Ferrara** (Division of Nephrology and Dialysis, "G.B. Morgani-L.Pierantoni" Hospital, Forlì); **E. Verrina, A. Trivelli** (Division of Nephrology, "G. Gaslini" Pediatric Institute, Genova); **P. Esposito, G. Garibotto, E. Paoletti, A. Sofia** (Division of Nephrology, Dialysis and Transplantation, "San Martino" Hospital, Genova); **R.M. Rapanà** (Division of Nephrology, Imola Hospital, Imola); **L. Morabito** (Division of Nephrology and Dialysis, Imperia Hospital, Imperia); **D. Rolla, E. Costa, V. Corbani, L. Panaro** (Division of Nephrology, S'Andrea Hospital, La Spezia); **R. Delfino** (Unit of Medicine, Lavagna Hospital, Lavagna, Genova); **P. Protopapa, A. De Pascalis** (Division of Nephrology and Dialysis, "V. Fazzi" Hospital, Lecce); **L. Del Vecchio, G. Pontoniero** (Division of Nephrology and Dialysis, "A.Manzoni" Hospital, Lecco); **N. Natali, M.G. Merletti** (Division of Nephrology and Dialysis, Macerata Hospital, Macerata); **M. Catarini** (Unit of Medicine, Macerata Hospital, Macerata); **A. Casani** (Division of Nephrology and Dialysis, "S. Giacomo e Cristoforo" Hospital, Massa); **M.L. Perrino, F. Ravera, E. Zucchetti** (Division of Nephrology "Niguarda Cà Granda" Hospital, Milano); **G. Donati, F. Facchini, F. Fontana, M. Leonelli** (Division of Nephrology, Dialysis and Transplant, Policlinico Hospital, Modena); **G. Leonardi** (Division of Hematology, Policlinico Hospital, Modena); **M. Carpenedo** (Division of Hematology, S. Gerardo" Hospital, Monza); **B.R. Di Iorio** (Division of Nephrology, "A. Cardarelli" Hospital, Napoli); **G. Malgieri, A. Ferretti** (Division of Nephrology, Children's Hospital "Santobono", Napoli); **C. Musetti, F. Grossi, A. Nappo, F. Cofano** (Division of Nephrology, 'Maggiore della Carità' Hospital, Novara); **F. Boier, A.A. Leoni** (Division of Nephrology and Dialysis, San Francesco Hospital, Nuoro); **S. Ulisciani** (Division of Internal Medicine, "S. Luigi" Hospital, Orbassano, Torino); **G. Mandrile** (Medical Genetics, "S. Luigi" Hospital, Orbassano, Torino); **E. Vidal, E. Benetti, M. Parolin** (Pediatric Division, Policlinico Hospital, Padova); **A. Bertomoro, E. Omenetto** (Internal Medicine, Policlinico Hospital, Padova); **U. Vertolli** (Division of Nephrology and Dialysis Policlinico Hospital, Padova); **U. Rotolo** (Division of Nephrology and Dialysis, "Ospedale Civico e Benefratelli", Palermo); **U. Maggiore, M. Delsante, A. Vaglio, A. Palmisano, F.M. Fani** (Division of Nephrology, Ospedale Maggiore, Parma); **M. Gotti, P. Zappasodi** (Division of Hematology, "San Matteo" Hospital, Pavia); **T. Rampino** (Division of Nephrology, "San Matteo" Hospital, Pavia); **G. Agnelli, A. Blass** (Division of Internal Medicine, University of Perugia, Perugia); **R. Brugnano, R. Sciri** (Division of Nephrology, "Santa Maria della Misericordia" Hospital, Perugia); **A. Carotti, S. Ballanti** (Hematology and Transplantation, University of Perugia); **M. Di Luca, F. Manenti, V. Nastasi, O. Paci delle Costanza** (Division of Nephrology and Dialysis, S. Salvatore, Pesaro); **S. De Amicis, L. Melfa, P. Poisetti** (Division of Nephrology and Dialysis, Hospital of Piacenza, Piacenza); **D. Giannese** (Division of Nephrology and Dialysis, "S. Chiara" Hospital, Pisa); **W. Mancini** (Division of Nephrology, "Santa Maria degli Angeli" Hospital, Pordenone); **R. Dell'Amico, L. Cesca** (SC Pediatria, AO "Santa Maria degli Angeli" Pordenone); **R.M. Roperto** (Division of Nephrology and Dialysis, S. Stefano Hospital, Prato); **G. Garozzo** (Division of Hematology, "M.P. Arezzo" Hospital, Ragusa); **A. Buscarini, M. Monti, M. Righini** (Division of Nephrology and Dialysis, Santa Maria delle Croci, Ravenna); **A. Bovino, E. Gnappi, F. Iannuzzella, D. Somenzi** (Division of Nephrology and Dialysis, Arcispedale Santa Maria Nuova, Reggio Emilia); **A. Rigotti** (Division of Nephrology and Dialysis, Hospital of Rimini); **G. Meloni** (Department of Cellular Biotechnology and Hematology, "La Sapienza" University, Roma); **F. Emma, M. Vivarelli, A. Gianviti, L. Dello Strologo** (Division of Nephrology and Dialysis, "Bambino Gesù" Pediatric Hospital, Roma); **P. De**

**Paoli, M. Rosa** (Division of Nephrology, S. Camillo-Forlanini Hospital, Roma); **A. Naticchia** (Division of Nephrology, "A. Gemelli" Hospital, Roma); **A. Gatto, P. Valentini** (Pediatric Division, "A. Gemelli" Hospital, Roma); **G. Gambaro** (Division of Nephrology and Dialysis, Columbus Hospital, Roma); **S. Trisolini** (Division of Hematology, Umberto I, Roma); **R. Paolini** (Division of Oncohematology, Rovigo Hospital, Rovigo); **G. Gatti, A. Feliciani** (Division of Nephrology and Dialysis, Bolognini Hospital, Seriate, Bergamo); **P.R. Scalzulli** (Division of Hematology, "Casa Sollievo delle Sofferenza" Hospital, S. Giovanni Rotondo, Foggia); **G. Loriga, F. Cabigiosu** (Division of Nephrology and Dialysis, Sassari Hospital, Sassari); **A. Guarnieri** (Division of Nephrology and Dialysis, Le Scotte Hospital, Siena); **B. Gianoglio, L. Peruzzi** (Division of Nephrology and Dialysis, "Regina Margherita" Pediatric Hospital, Torino); **C. Rollino, F. Quarello** (Service of Nephrology and Dialysis, "S.G. Bosco" Hospital, Torino); **L. Biancone, M. Burdese, A. Lavacca, A. Mella** (Division of Nephrology and Dialysis, "Città della Salute e della Scienza" Hospital, Torino); **G. Cesano** (Division of Nephrology, Martini Hospital, Torino); **A. De Gaetano, L. Sottini, T. Dipalma, F. Valente** (Division of Nephrology, "S. Chiara" Hospital, Trento); **M. Dugo, A. Caberlotto, A. Pasi** (Division of Nephrology, S. Maria di Cà Foncello Hospital, Treviso); **V. Di Maso, E. Bedina** (Division of Nephrology and Dialysis, "Cattinara" Hospital, Trieste); **A. Ambrosini, M. De Cicco** (Division of Nephrology, "Fondazione Macchi" Hospital, Varese); **P. Bernich, E. Bertolini** (Division of Nephrology and Dialysis, "Borgo Trento" Hospital, Verona); **F. Gastaldon, S. Milan Manani** (Division of Nephrology and Dialysis, San Bortolo Hospital, Vicenza); **P. Trucillo** (Division of Hemodialysis, S. Maria Maddalena Hospital, Volterra).

#### *Investigators - Abroad*

**J. Ferraris, N. Imperiali, C.F. Varela, V. Videla** (Division of Nephrology, "Hospital Italiano de Buenos Aires", Buenos Aires, Argentina); **M. Orias** (Centro de Enfermedades Renales y Transplante, Cordoba, Argentina); **P. Hughes** (Nephrology Department, Royal Melbourne Hospital, Melbourne, Australia); **P. Henning** (Renal Unit, Women's and Children's Hospital, North Adelaide, Australia); **N. Isbel, D. Mudge, C. Van Eps** (Department of Nephrology, Princess Alexandra Hospital, Brisbane, Australia); **C. Georges** (Renal Medicine Department, Concord Hospital, Concord, Australia); **W. Lim** (Department of Renal Medicine, Sir Charles Gairdner Hospital, Western Australia); **S. Baiko, N. Makhanko** (Chance International Children's Charity Foundation, Minsk, Belarus); **J. Morelle** (Service de Nephrologie, Clinique Universitaires Saint Luc, Bruxelles, Belgium); **L. Pipeleers** (Department of Nephrology and Hypertension, UZ Bruxelles, Belgium); **P. Girardelli Mendonca** (Fundação Hospitalar do Estado de Minas Gerais, Medicina, com ênfase em Nefrologia, Itajuba, Brazil); **D. Bergstrom** (Division of Hematology, Memorial University school of Medicine, St. John's Canada); **J. Garland, S. Moran** (Kingston General Hospital, Queen's University, Kingston ON Canada); **A.L. Lapeyraque** (Département de Pédiatrie, Université de Montréal, CHU Sainte-Justine, Canada); **C. Prasad** (Department of Pediatrics, McMaster University Hamilton, ON, Canada); **C.J. Patriquin** (Hematology & Apheresis Medicine, University Health Network - Toronto General Hospital, Canada); **T. Prestige** (Children's Hospital of Eastern Ontario, Division of Oncology/Hematology/BMT, Vancouver, Canada); **M. Azocar** (Pediatric Nephrology, Hospital Luis Calvo Mackenna, Santiago, Chile); **A. Delucchi** (Pediatric Nephrology, Clinica Alemana de Santiago, Santiago, Chile); **C. Gonzales** (Pediatric Nephrology Unit, Sotero del Rio's Hospital, Santiago, Chile); **M. Spartalis** (Nephrology Department, Nicosia General Hospital, Nicosia-Cipro); **N. Basic Jukic, B. Brunetta** (Department of Nephrology, Clinical Hospital Centre Zagreb, Croazia); **J. Reiterova** (Nephrology Unit, General Faculty Hospital, Prague, Czech Republic); **A. Parikova, S. Rajnochová Bloudíčková** (Nephrology Department, Institute for Clinical and Experimental Medicine, Prague, Czech Republic); **T. Ring** (Department of Nephrology, Aalborg Hospital, Aalborg, Denmark); **H. Fathy** (Alexandria University Children's Hospital - Pediatric Nephrology, Egypt); **D. Müller** (Department of Pediatric Nephrology, Charité, Berlin Germany); **B. Hoppe** (Division of Pediatric Nephrology, University of Bonn, Germany); **G. Schalk** (University Clinic of Cologne, Germany); **M.J. Kemper** (Universitätsklinikum Hamburg-Eppendorf, Hamburg, Germany); **K. Mussig** (Medizinische Klinik II, Universitäts Klinikum Tübingen, Germany); **M. Garatzioti** ("Agia Sophia" Children's Hospital, Athens University, Goudi Athens, Greece); **E. Chan** (Nephrology Unit, Princess Margaret Hospital, Hong Kong); **I. Veerappan** (Department of Nephrology, KG Hospital, Coimbatore, India); **S. Jagadeesh** (Mediscan, Mylapore, Chennai, India); **S. Margabandhu** (Apollo Hospitals Chennai, Tamilnadu - India); **S. Bhurke** (Nephrology Unit,

BSES MG Hospital, Mumbai, India); **H. Wrutti** (Kem Hospital, Mumbai, India); **V.S. Reddy** (Krishna Institute of Medical Sciences, Secunderabad, India); **K. Sampath Kumar** (Meenakshi Mission Hospital and Research Centre, Tamilnadu, India); **M.R. Ardalan** (Nephrology Department, Tabriz Medical University, Tabriz, Iran); **S. Aviner** (The Barzilai University Medical Center, Pediatrics Unit, Ashkelon, Israel); **S. Revel Vilik** (Hadassah Medical Center, Jerusalem, Israel); **I. Eisenstein, P. Shirley** (Pediatric Nephrology, Rambam Medical Centre, Haifa, Israel); **K. Yasuda** (Rinku General Medical Center, Osaka, Japan); **L. Abromaityte, M. Miglinas** (Nephrology Center; Vilnius University Hospital Santoros Klinikos, Vilnius-Lithuania); **S.Y. Tan** (Nephrology Clinic, Prince Court Medical Centre, Kuala Lumpur, Malaysia); **V. Gracchi** (Beatrix Children's Hospital, Groningen, Netherlands); **G. Kucharska** (Chorzowskie Centrum, Division of Pediatrics, Chorzow, Poland); **W. Wojciech** (Department of Nephrology, Transplantation and Internal Medicine, Uniwersyteckie Centrum Kliniczne, Gdansk, Poland); **Z. Wolyniec** (Dialysis and Nephrology Unit, Gdynia, Poland); **J. Zachwieja, J. Soltysiak, M. Zaniew** (Department of Pediatric Nephrology and Dialysis, Poznan, Poland); **K. Pawlaczyk** (Department of Nephrology, Transplantology and Internal Medicine, University of Medical Science, Poznan, Poland); **R. Grenda** (Department of Nephrology and Kidney Transplantation, The Children's Memorial Health Institute, Warsaw, Poland); **B. Leszczynska, J. Rubik** (Department of Pediatric Nephrology, University Children's Hospital, Warsaw, Poland); **W. Jarmuzek** (The Children's Memorial Health Institute, Warsaw, Poland); **I. Makulska, D. Zwolinska** (Department of Pediatric Nephrology - Medical University of Wroclaw, Poland); **A.J. Correia** (Hospital Pediatrico de Coimbra, Unidade de Nefrologia Pediatrica, Coimbra, Portugal); **M.S. Faria** (Department of Pediatric Nephrology, "Maria Pia" Hospital, Porto, Portugal); **J. P. Oliveira** (Hospital De Sao Joao - Genetica Medica, Porto, Portugal); **A. Lungu** (Pediatric Nephrology Department, Fundeni Clinical Institute, Bucharest, Romania); **T. Pankratenko** (Pediatric Department, St. Vladimir Pediatric Hospital, Moscow, Russia); **A. Alswaid** (King Abdulaziz Medical City, Riyadh, Saudi Arabia); **R. Bogdanovic** (Department of Nephrology, Institute of Mother and Child Health Care of Serbia); **P. Nourse** (Red Cross Children's Hospital, Cape Town, South Africa); **J. Lam, B. Rajat** (KK Women's and Children's Hospital, Singapore); **A. Avila Bernabeu** (Department of Nephrology, Valencia, Spain); **M. Girsberger, P. Hirt-Minkowzki, K. Konig, S. Schaub** (Transplantation, Immunology and Nephrology, University Hospital, Basel, Switzerland); **L. Berwert** (Division of Nephrology, S. Giovanni Hospital, Bellinzona, Switzerland); **G. Simonetti** (Pediatric Nephrology, Inselspital, University Children's Hospital, Bern, Switzerland); **N. Marangon** (Services de Nephrologie et de Transplantation, Hopitaux Universitaires de Geneve, Switzerland); **J. Schmidtko** (Service de Nephrologie et Hypertension, Centre Hospitalier Universitaire Vaudois, Lausanne, Switzerland); **F.I. Binet** (Department of Nephrology and Renal Transplantation, Kantonsspital St. Gallen, Switzerland); **C. Huesler** (Innere Medizin und Nephrologie, Kantonsspital St. Gallen, Switzerland); **G. Spartà** (Nephrology Unit, University Children's Hospital, Zürich, Switzerland); **P. Rhyn, A. Scleich** (University Hospital, Zürich, Switzerland); **A. Schwarz** (Nephrology Department, City Hospital Waid, Zürich, Switzerland); **Y. Bilginer, S. Unal** (Division of Pediatric Hematology, Hacettepe University, Ankara, Turkey); **H. Kavus** (Gulhane Military Medical Academy, Department of Medical Genetics, Etlik Ankara Turkey); **M. Ekim** (Ankara University School of Medicine, Department of Pediatric Nephrology, Ankara, Turkey); **A. Yilmaz** (Istanbul Medical Faculty, Pediatric Nephrology Department, Istanbul, Turkey); **Y.K. Ebru** (Pediatric Hematology, Samsun Maternity and Child Health Hospital, Samsun, Turkey); **O. Al Masri** (Shaikh Khalifa Medical City, Abu Dhabi, United Arab Emirates); **M. H. Gallagher** (South West Thames Renal and Transplantation Unit, St. Helier Hospital, Surrey, United Kingdom); **J. Mittleman** (Cedars-Sinai Medical Center, Los Angeles, CA, USA); **J. Thurman** (University of Colorado, Denver, Division of Renal Diseases and Hypertension, Aurora, CO, USA); **R. Montgomery** (Johns Hopkins Hospital, Baltimore, MD, USA); **J. Steinke** (Children's Mercy - Hospitals & Clinics, Section of Nephrology, Michigan, Grand Rapids, USA); **M. Elliott, A. Roshini Sarah** (Mayo Clinic, Rochester, MN, USA); **R. Baliga** (Department of Pediatrics, Division of Nephrology, University of Mississippi Medical Center, MS, USA); **P. Lane, L. Wrenshall** (Nebraska Medical Center, Omaha, NE, USA); **K. Lieberman** (Pediatric Nephrology, Hackensack University Medical Center, Hackensack, NJ, USA); **S. Gurkan** (Robert Wood Johnson Medical School, New Brunswick, NJ, USA); **D.J. Cohen, M. Ghanta** (Columbia Presbyterian Medical Center, New York, NY, USA); **M.G. Seikaly** (Pediatric Nephrology, Children's Medical Center, Dallas, Texas, USA); **I. Restaino** (Pediatric Nephrology, Children's Hospital of the King's Daughters, Norfolk, VA, USA);

**J.C. Barrett** (Division of Hematology-Oncology, Virginia Commonwealth University, Richmond, VA, USA); **V. Chadha** (VCU Medical Center, Pediatric Nephrology, Richmond, VA, USA).
